# Supplementary material
Source: PubMed Central journal article supplement (PMC7854523)
Supplement: NIHMS1653573-supplement-1653573_Supp_Tab1_Fig1.pdf [file NIHMS1653573-supplement-1653573_Supp_Tab1_Fig1.pdf]

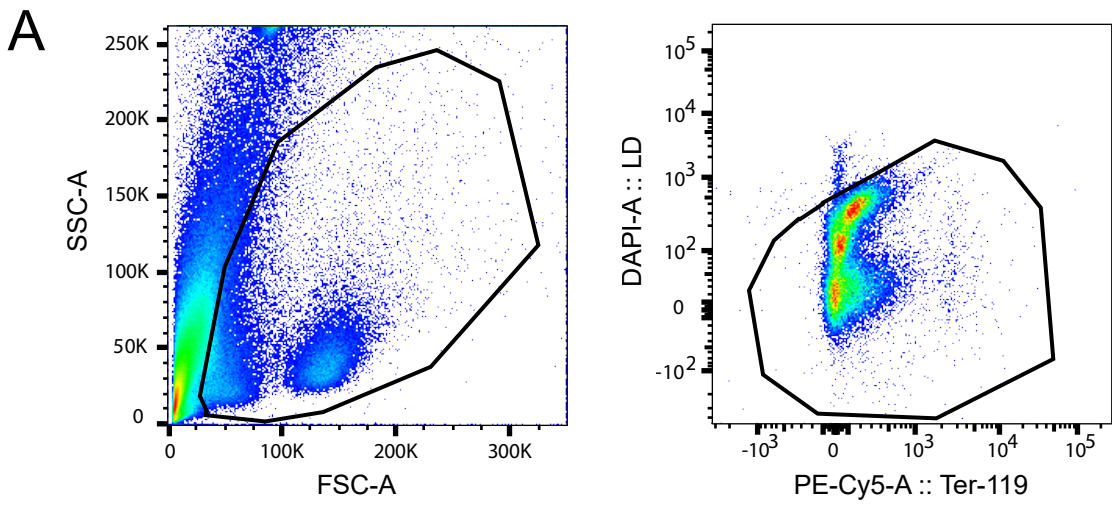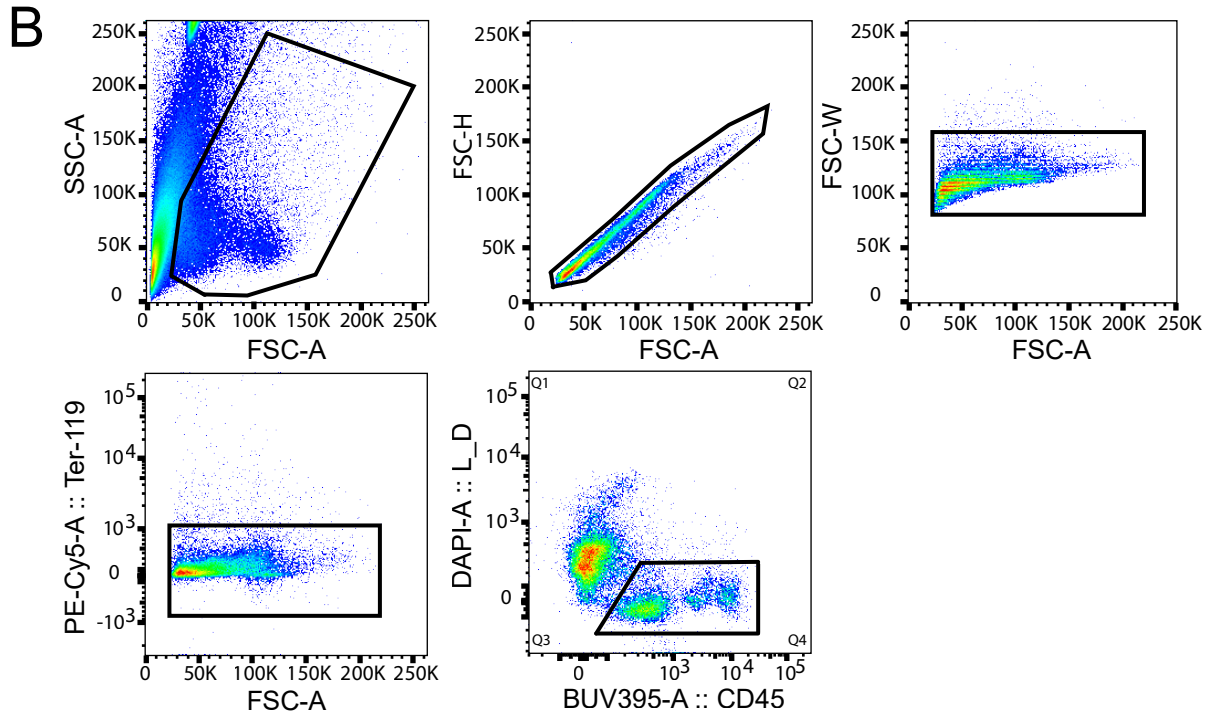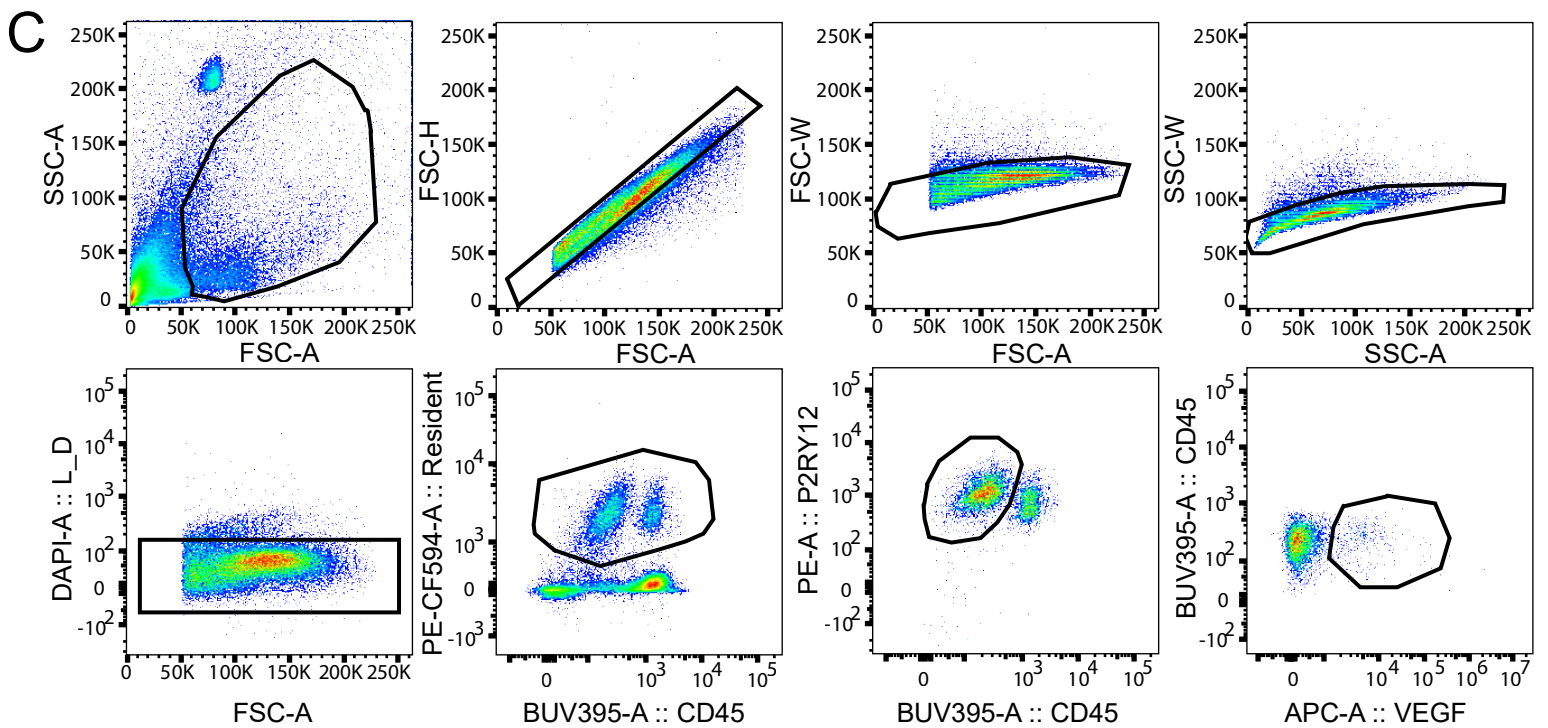

Supplementary Figure 1

**Supplementary Figure 1. Gating strategies for flow cytometry experiments. A.**

Gating strategy used prior to generating the UMAPs shown in Extended Data Figure 2F-

G. **B.** Gating strategy used to identify CD45<sup>+</sup> Ter-119<sup>-</sup> live single cells prior to using an

unsupervised clustering algorithm to separate cells into subpopulations (PhenoGraph,

FlowJo) and a uniform manifold approximation and projection (UMAP, FlowJo). This

gating was used for the data presented in Figures 2A, 2F, 6E, 6F and Extended Data

Figures 5A, 5B, 10E. C. Gating strategy used to identify VEGF-A<sup>+</sup> microglia in Figures

5H, 5I and Extended Data Figure 10A.

**Table S1: Patient demographics, clinical presentation and outcomes, and imaging findings per group**

| Groups                                 |                                           | No hemorrhage     | Petechiae (HI)   | Hematoma (PH)     | P - value |
|----------------------------------------|-------------------------------------------|-------------------|------------------|-------------------|-----------|
| Patient characteristics                | Patient number                            | 16                | 8                | 6                 | n/a       |
|                                        | Age (median; range)                       | 65 (31 - 92)      | 62 (28 - 82)     | 68 (51 - 90)      | 0.76      |
|                                        | Gender (Male/ Female)                     | 7 / 9             | 4 / 4            | 1 / 5             | 0.41      |
|                                        | LKN to triage (min; mean $\pm$ SD)        | 165.1 $\pm$ 148.7 | 123.6 $\pm$ 66.7 | 276.2 $\pm$ 197.7 | 0.2       |
|                                        | IV tPA n(%)                               | 10 (62.5)         | 7 (87.5)         | 3 (50)            | 0.29      |
| NIHSS (median; range)                  | Admission                                 | 17 (2 - 28)       | 20 (1 - 27)      | 16.5 (14 - 25)    | 0.83      |
|                                        | 2 hours                                   | 24.5 (2 - 32)     | 21 (5 - 35)      | 17.5 (3 - 30)     | 0.86      |
|                                        | 24 hours                                  | 7.5 (0 - 26)      | 8 (2 - 26)       | 19 (7 - 21)       | 0.02      |
| mRS rating (median; range)             | At discharge                              | 2 (0 - 6)         | 2.5 (0 - 5)      | 5 (3 - 5)         | 0.01      |
|                                        | 5 days                                    | 2 (0 - 5)         | 3 (1 - 5)        | 5 (4 - 5)         | 0.01      |
|                                        | 30 days                                   | 2 (0 - 5)         | 2 (0 - 5)        | 4.5 (2 - 5)       | 0.03      |
|                                        | 90 days                                   | 2 (0 - 6)         | 1 (0 - 3)        | 4.5 (2 - 6)       | 0.01      |
| Occluded vessel n(%)                   | ICA                                       | 1 (6.3)           | 0 (0)            | 2 (33.3)          | 0.48      |
|                                        | proximal M1                               | 10 (62.5)         | 4 (50)           | 3 (50)            |           |
|                                        | distal M1                                 | 2 (12.5)          | 4 (50)           | 1 (16.7)          |           |
|                                        | M2                                        | 3 (18.8)          | 0 (0)            | 0 (0)             |           |
| TICI grade (%)                         | 2A Partial Perfusion                      | 1 (6.3)           | 1 (12.5)         | 2 (33.3)          | 0.19      |
|                                        | 2B Complete filing but slower than normal | 2 (12.5)          | 3 (37.5)         | 2 (33.3)          |           |
|                                        | 3 Complete perfusion                      | 13 (81.3)         | 4 (50)           | 2 (33.3)          |           |
| DWI Volume Index (cm; mean $\pm$ SD)   | Pre EVT                                   | 2.11 $\pm$ 0.82   | 2.65 $\pm$ 0.98  | 2.77 $\pm$ 1.03   | 0.26      |
|                                        | Post EVT                                  | 2.13 $\pm$ 0.88   | 3.01 $\pm$ 1.04  | 3.77 $\pm$ 1.32   | 0.01      |
|                                        | 24 hours                                  | 2.55 $\pm$ 1.2    | 3.46 $\pm$ 1.19  | 4.75 $\pm$ 1.46   | 0.006     |
|                                        | 5 days                                    | 2.72 $\pm$ 1.28   | 3.55 $\pm$ 1.16  | 4.9 $\pm$ 1.32    | 0.007     |
| FLAIR Volume Index (cm; mean $\pm$ SD) | 24 hours                                  | 2.38 $\pm$ 1.06   | 3.29 $\pm$ 1.13  | 4.97 $\pm$ 0.98   | 0.0002    |
|                                        | 5 days                                    | 2.68 $\pm$ 1.24   | 3.75 $\pm$ 1.26  | 5.18 $\pm$ 1.3    | 0.002     |
| HARM + (%)                             | 24 hours                                  | 1 (6.3)           | 2 (25)           | 2 (33)            | 0.24      |

HI = Hemorrhagic infarction; PH = Parenchymal hematoma; LKN = Last known normal; tPA = Tissue plasminogen activator; NIHSS = NIH Stroke Scale; mRS = modified Rankin Scale; ICA = Internal carotid artery; M1, M2 are branches of middle cerebral artery; TICI = Thrombolysis in cerebral infarction (TICI) scale; EVT = endovascular thrombectomy; HARM = hyperintense acute reperfusion injury marker. P-value were calculated using a one-way ANOVA for quantitative dependent variables, a Kruskal-Wallis test for ordinal variables or a Chi-square test for nominal variables.
